# Supplementary material for: Gut microbiota modulates lung fibrosis severity following acute lung injury in mice
Source: PubMed Central journal article supplement (PMC9772329; doi:10.1038/s42003-022-04357-x), 2022-12-22
Supplement: 42003_2022_4357_MOESM2_ESM.pdf [file 42003_2022_4357_MOESM2_ESM.pdf]

## Supplementary Figures

# **Gut microbiota modulates lung fibrosis severity following acute lung injury in mice**

Ozioma S. Chioma<sup>1</sup>, Elizabeth K. Mallott, Austin Chapman<sup>1</sup>, Joseph C. Van Amburg<sup>1</sup>, Hongmei Wu<sup>1</sup>, Binal Shah-Gandhi<sup>1</sup>, Nandita Dey<sup>1</sup>, Marina E. Kirkland<sup>1</sup>, M. Blanca Piazuelo<sup>5</sup>; Joyce Johnson<sup>4</sup>, Gordon R. Bernard<sup>6</sup>, Sobha R. Bodduluri<sup>7</sup>, Steven Davison<sup>8</sup>, Bodduluri Haribabu<sup>7</sup>, Seth R. Bordenstein<sup>2, 3, 4</sup>, Wonder P. Drake<sup>\*1, 4</sup>

Supplemental Fig. 1: Housing conditions does not impact morbidity and mortality during saline treatment.

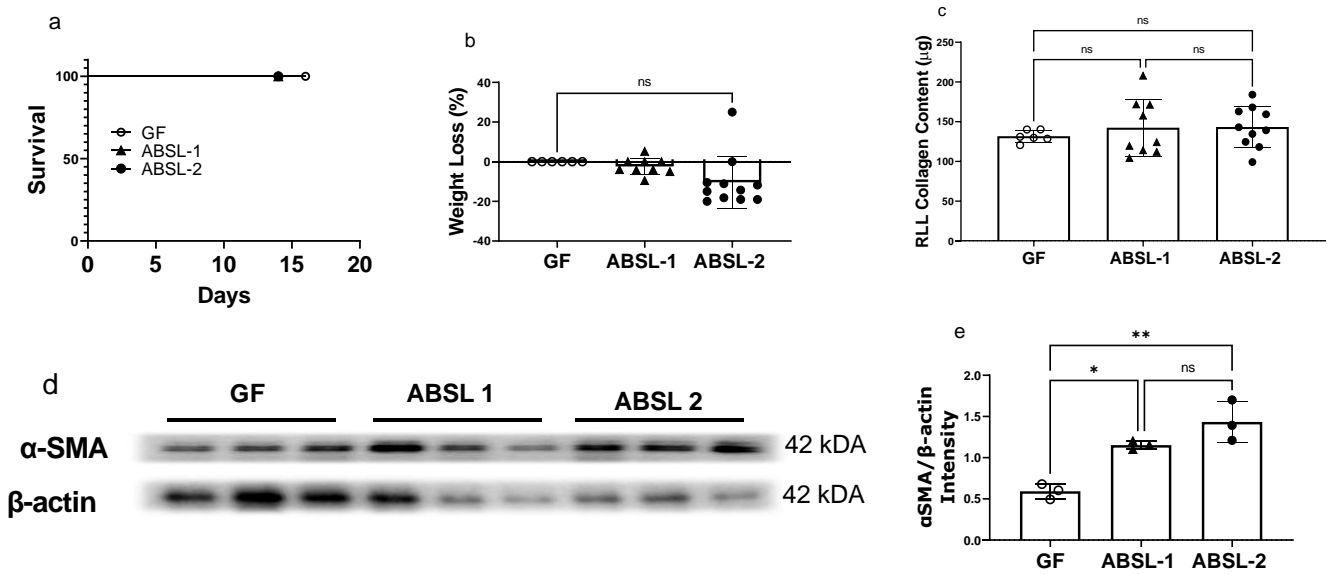

**(a)** Survival curve of mice housed in 3 separate facilities and intranasally inoculated with saline. **(b)** Weight loss of mice in the saline treatment cohorts; **(c)** Sircol assay of mice housed in 3 separate facilities and treated with saline (control group); **(d)** immunoblot of mice lung samples with antibodies against alpha smooth muscle actin and beta actin in bleomycin treated cohort; **(e)** quantification of immunoblot analysis; Data are reported as mean  $\pm$  SD with each dot representing an individual mouse. Statistical significance was assessed using a one-way ANOVA with Sidak's multiple comparison's test for b, c; subpanel e was analyzed using Bonferroni's test due to an n=3 for each group. \*P<0.05 \*\*P < 0.01, \*\*\*\*P < 0.0001; ns = no significance; RLL: right lower lobe. n= 3-11 mice

**Supplementary Fig. 2: Species evenness contributes to alpha diversity in ABSL-1 housed mice.**

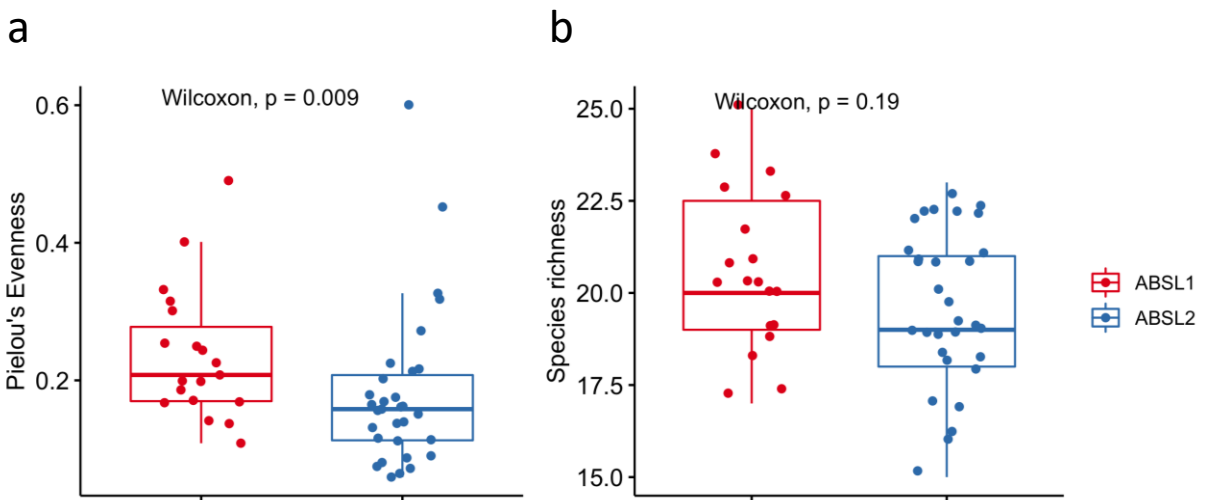

**(a)** Pielou's evenness and **(b)** species richness were assessed in ABSL-1 and ABSL-2 reared mice. Each dot represents an individual mouse, and median and interquartile range are indicated in the figure.

**Supplemental Fig. 3:** Nonlinear multidimensional scaling (MDS) plot showing differences in microbial taxonomic composition.

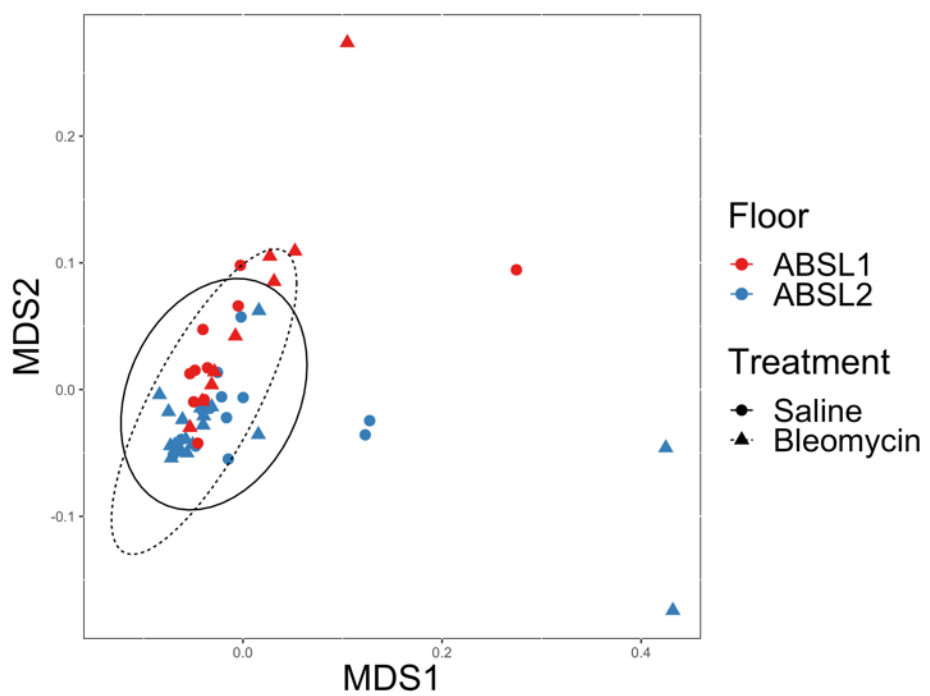

Nonlinear multidimensional scaling (MDS) plot showing differences in microbial taxonomic composition of the gut microbiome based on Bray-Curtis index in ABSL1 or ABSL2 mice).  $n = 13-27$  mice per cohort. The experiment was independently conducted once.

**Supplemental Fig. 4: Functional profiles are not different between floor or treatment when using Bray-Curtis dissimilarity matrices.**

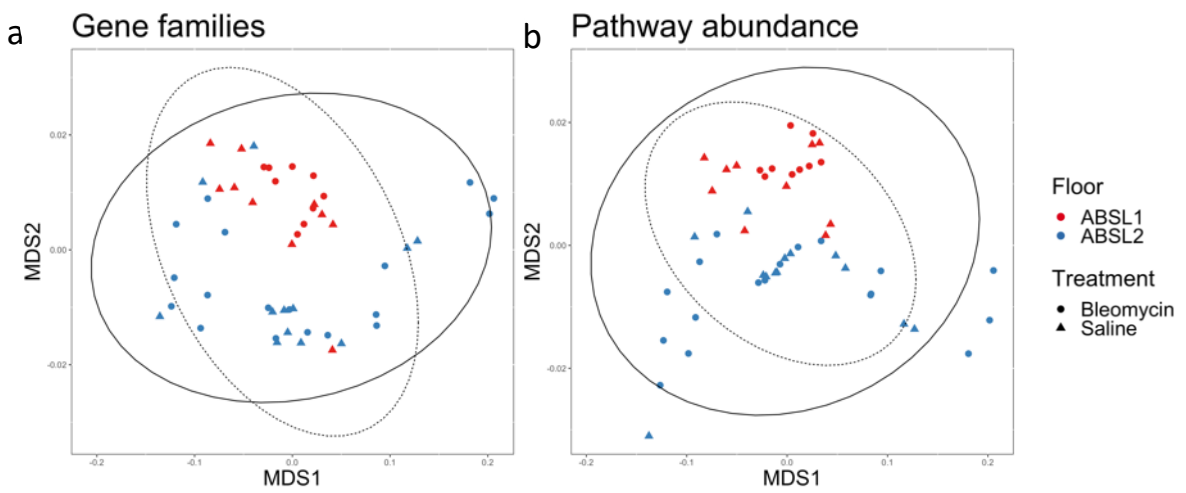

**(a)** Gene family abundance and **(b)** MetaCyc reaction pathway abundance profiles based on Bray-Curtis dissimilarity matrices.

Supplementary Fig. 5a-d: Representative histogram depicting IL-6 expression on CD4+ T cells in GF, ABSL-1 and ABSL-2 bleomycin treated mice.

**a. CD4<sup>+</sup> IL-6<sup>+</sup> T Cells (%)**

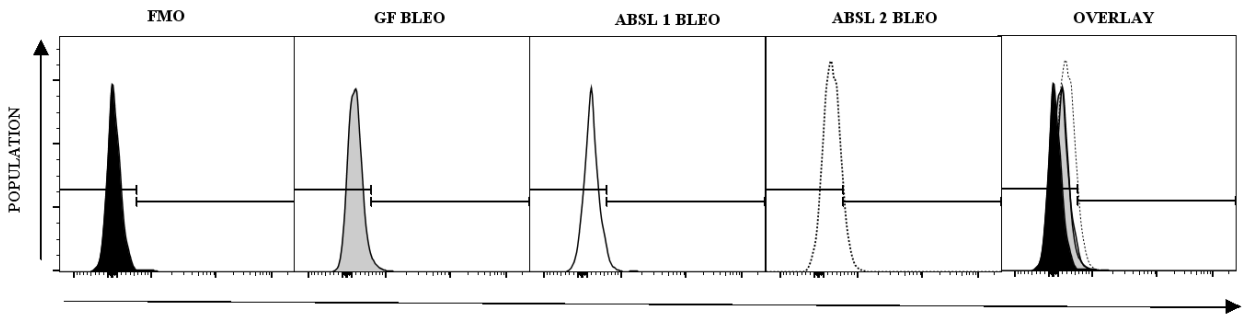

**b. CD4<sup>+</sup> GP130<sup>+</sup> T Cells (%)**

CD4<sup>+</sup> IL6<sup>+</sup> T CELLS

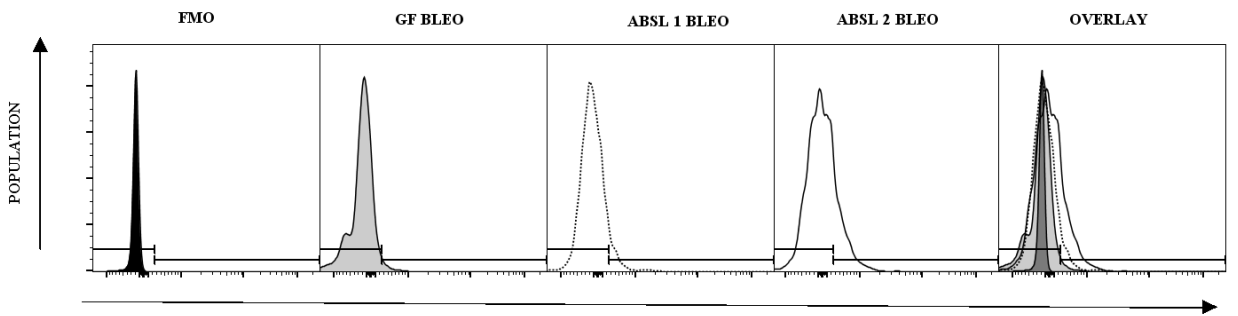

**c. CD4<sup>+</sup> PD-1<sup>+</sup> IL-17A<sup>+</sup> T Cells (%)**

CD4<sup>+</sup> GP130<sup>+</sup> T CELLS

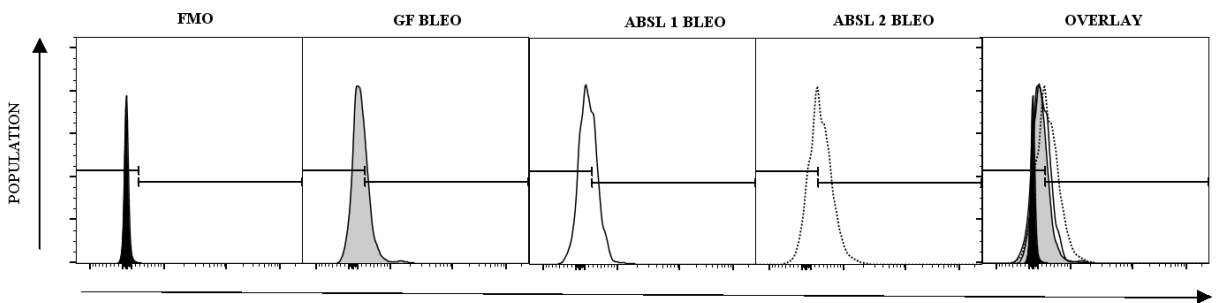

**d. CD4<sup>+</sup> pSTAT3<sup>+</sup> T Cells (%)**

CD4<sup>+</sup> IL17A<sup>+</sup> PD1<sup>+</sup> T CELLS

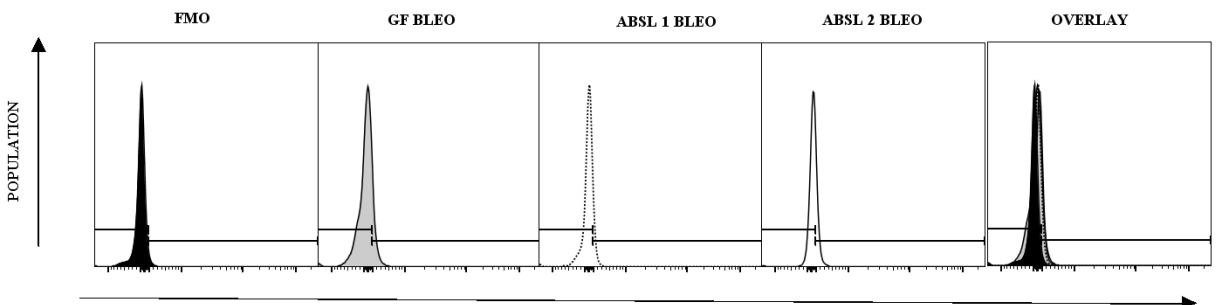

CD4<sup>+</sup> pSTAT3<sup>+</sup> T CELLS

Representative histogram depicting (a) IL-6A+, (b) GP130, (c) PD-1+ IL-17A+, and (d) pSTAT3 expression on CD4+ T cells in GF mice, mice housed in ABSL 1 and ABSL2 Facilities. GF: Germ-free, ABSL-1: Animal Biosafety Level 1, ABSL-2: Animal Biosafety Level 2

Supplemental Fig. 6: Gut microbial diversity and taxa associate with inflammatory pulmonary lung responses.

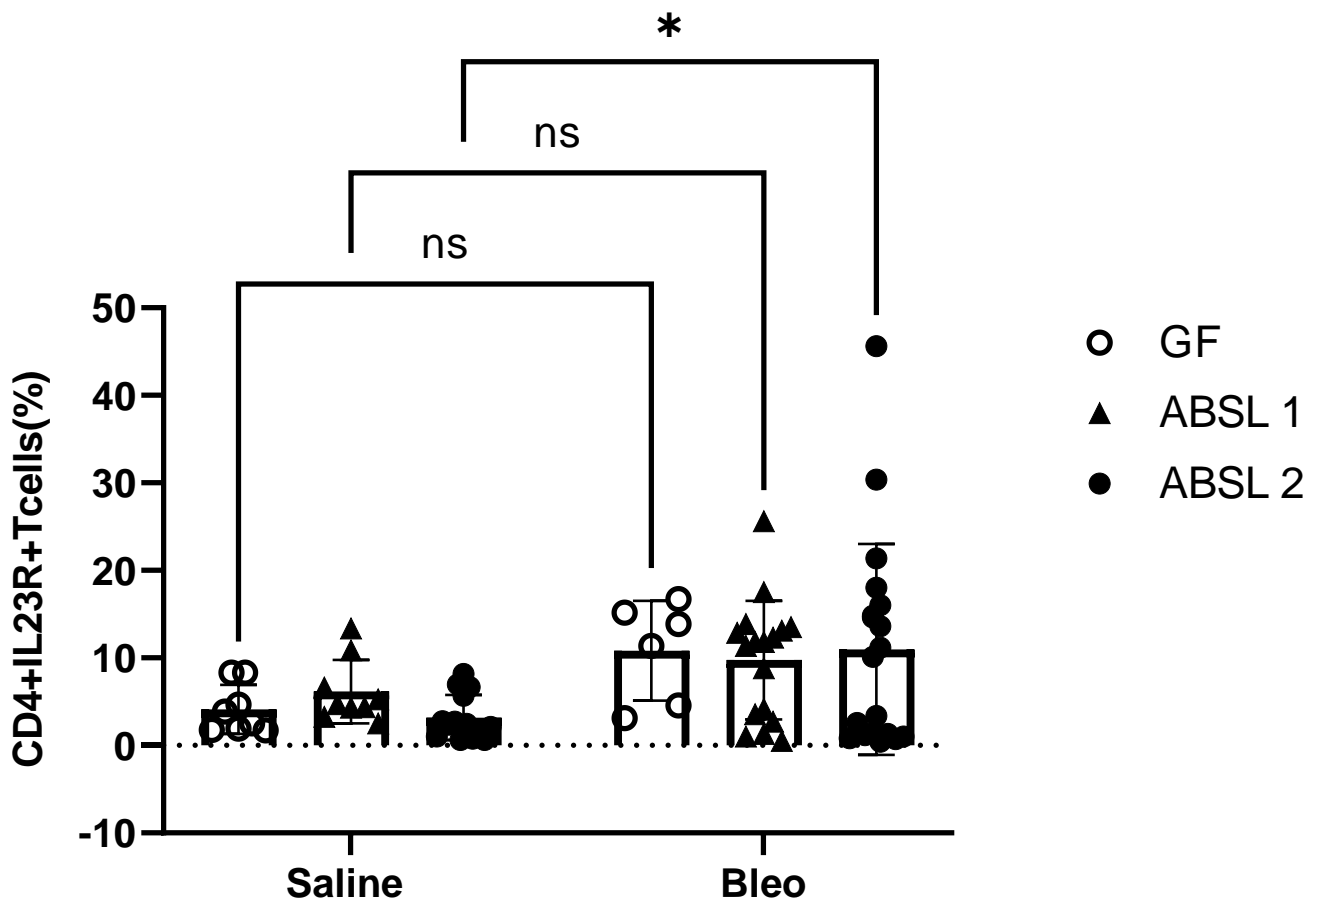

Single cell lung suspensions were obtained from mice housed in three different facilities (GF, ABSL-1 and ABSL-2). Flow cytometry analysis was conducted for IL-23R expression on CD4+T cells. Statistical significance was assessed using a two-way ANOVA with Tukey's multiple comparison's test. \*P<0.05, \*\*P < 0.01, \*\*\*\*P< 0.0001, ns = no significance n=6-19.

**Supplemental Fig. 7:** Western Blot image of Collagen-1 alpha (COL1A)

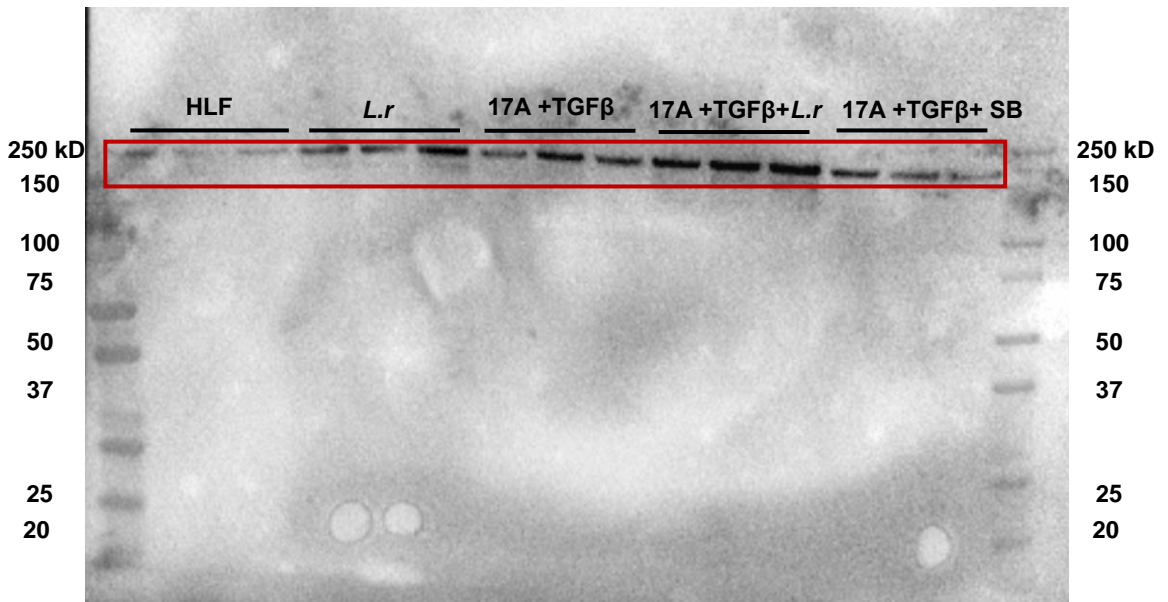

Immunoblot of Human Lung Fibroblast (HLF) assayed for collagen type 1A (col1a) production after HLF's are treated with rIL-17A and TGFβ1, supernatant from *Lactobacillus* grown to log phase and rIL-17A + TGFβ1 and sodium butyrate. Collagen-1 alpha (COL1A) shown at 210 kDA



**Supplemental Fig. 8:** Western Blot image of GAPDH

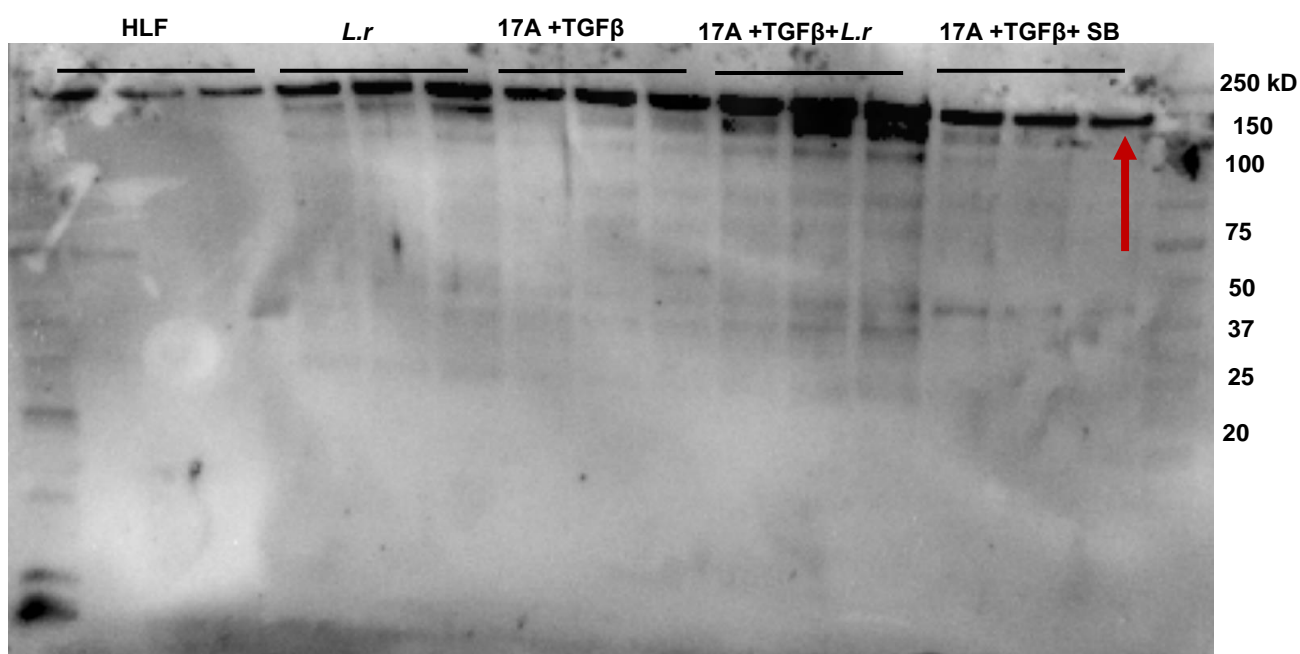

Immunoblot of Human Lung Fibroblast (HLF) assayed for GAPDH production after HLF's are treated with rIL-17A and TGFβ1, supernatant from *Lactobacillus rhamnosus* grown to log phase and rIL-17A + TGFβ1 and sodium butyrate. GAPDH Tetramer shown at 146 kDA.

**Supplemental Table 1:** Antibodies used for flow cytometric analysis of murine single cell suspensions.

| <b>Antibody</b>                                    | <b>Vendor Catalog No</b> | <b>Host organism; antibody type</b> | <b>Clone</b> | <b>Conc (µg)/volume (µL) per test*</b> |
|----------------------------------------------------|--------------------------|-------------------------------------|--------------|----------------------------------------|
| CD3 Alexa Fluor 700                                | Biolegend 100216         | Rat Monoclonal                      | 17A2         | 0.25 µg/µL                             |
| CD4 APC-Cy7                                        | Biolegend 100414         | Mouse Monoclonal                    | GK1.5        | 0.1 µg/µL                              |
| IL-6 APC                                           | Biolegend 504808         | Rat Monoclonal                      | MP5-20F3     | 0.04 µg/µL                             |
| GP-130 PE                                          | Biolegend 149404         | Rat Monoclonal                      | 4H1B35       | 0.02 µg/µL                             |
| PD-1 PE-Cy7                                        | Biolegend 135216         | Rat Monoclonal                      | 29F.1A12     | 0.1 µg/µL                              |
| IL-17A PE                                          | Biolegend 506904         | Rat Monoclonal                      | TCII-18H10.1 | 0.1 µg/µL                              |
| STAT3 (pY703) Pacific Blue                         | BD 560312                | Mouse Monoclonal                    | 4/P-STAT3    | 10 µg/µL                               |
| IL-23R APC                                         | Biolegend 150906         | Rat Monoclonal                      | 12B2B64      | 0.02 µg/µL                             |
| *Test = 1 million cells in 50µl of staining buffer |                          |                                     |              |                                        |

**Supplemental Table 2:** Microbiome comparison of parent and gavaged murine fecal pellets.

| Group 1                                          | Group 2                                          | Bray-Curtis distance<br>(mean±stddev) | Jaccard distance<br>(mean±stddev) |
|--------------------------------------------------|--------------------------------------------------|---------------------------------------|-----------------------------------|
| Stool of ABSL1 mice                              | Stool of ABSL2 mice                              | 0.158±0.116                           | 0.301±0.088                       |
| Stool of germ-free mice gavaged with ABSL1 stool | Stool of ABSL1 mice                              | 0.980±0.039                           | 0.866±0.138                       |
| Stool of germ-free mice gavaged with ABSL2 stool | Stool of ABSL2 mice                              | 0.942±0.101                           | 0.739±0.144                       |
| Stool of germ-free mice gavaged with ABSL1 stool | Stool of germ-free mice gavaged with ABSL2 stool | 0.890±0.136                           | 0.772±0.239                       |
| Stool of germ-free mice gavaged with ABSL1 stool | Stool of ABSL2 mice                              | 0.982±0.033                           | 0.861±0.143                       |
| Stool of germ-free mice gavaged with ABSL2 stool | Stool of ABSL1 mice                              | 0.965±0.056                           | 0.755±0.139                       |

Average Bray-Curtis dissimilarities and Jaccard distances between ABSL1 stool, stool from ABSL1-gavaged germ-free mice, ABSL2 stool, and stool from ABSL2-gavaged germ-free mice.
