# Supplementary material for: Gut microbiota modulates lung fibrosis severity following acute lung injury in mice
Source: PubMed Central journal article supplement (PMC9772329; doi:10.1038/s42003-022-04357-x), 2022-12-22
Supplement: 42003_2022_4357_MOESM3_ESM.pdf [file 42003_2022_4357_MOESM3_ESM.pdf]

## **Description of Additional Supplementary Files**

**File name:** Supplementary Data 1

**Description:** The source data behind the graphs in the paper.
